# Supplementary material for: Germline Signals Deploy NHR-49 to Modulate Fatty-Acid β-Oxidation and Desaturation in Somatic Tissues of C. elegans
Source: PubMed Central journal article supplement (PMC4256272; doi:10.1371/journal.pgen.1004829), 2014-12-04
Supplement: pgen.1004829.s013.pdf [file pgen.1004829.s013.pdf]

Ratnappan et al., REVISED. Table S1: Retests of select clones found to suppress the up-regulation of *glp-1*; *Pstdh-1::GFP* in RNAi screen (whole-life RNAi)

| #  | Gene (cosmid #)                            | Retest #1    |            |                            | Retest #2  |                   | Retest #3  |                                        |
|----|--------------------------------------------|--------------|------------|----------------------------|------------|-------------------|------------|----------------------------------------|
|    |                                            | Observer 1   | Observer 2 | Comments                   | Observer 1 | Comments          | Observer 2 | Comments                               |
| 1  | <i>nhr-17</i> (C02B4.2)                    | *            | *          |                            | X          | no effect         | *          | mild suppressor                        |
| 2  | <i>nhr-31</i> (C26B2.3)                    | **           | **         | strong suppressor          | *          |                   | *          |                                        |
| 3  | <i>nhr-41</i> (Y104H12A.1)                 | not screened | *          | mild suppressor            | X          | no effect         | XX         | higher expression                      |
| 4  | <i>nhr-49</i> (K10C3.6)                    | *            | **         | strong suppressor          | XX         | higher GFP        | **         | strong suppressor                      |
| 5  | <i>nhr-49</i> (K10C3.6) <i>MV clone</i>    | *            | *          |                            | X          | no effect         | *          | strong suppressor                      |
| 6  | <i>nhr-54</i> (F36D3.2)                    | XX           | *          | no effect or higher GFP    | *          | mild suppression  | *          | mild suppressor                        |
| 7  | <i>nhr-60</i> (F57A10.5)                   | **           | **         | strong suppressor          | **         | strong suppressor | X          | no effect                              |
| 8  | <i>nhr-61</i> (W01D2.2)                    | **           | **         |                            | **         |                   | **         | wrong clone; discarded                 |
| 9  | <i>nhr-71</i> (K11E4.5)                    | *            | *          |                            | *          |                   | **         | originally identified as <i>nhr-33</i> |
| 10 | <i>nhr-80</i> (H10E21.3)                   | **           | **         |                            | *          |                   | **         |                                        |
| 11 | <i>nhr-81</i> (C47F8.8)                    | **           | **         | strong suppressor          | **         | strong suppressor | **         | strong suppressor                      |
| 12 | <i>nhr-87</i> (Y41D4B.7)                   | **           | **         | strong suppressor          | **         | strong suppressor | *          |                                        |
| 13 | <i>nhr-87</i> (Y41D4B.7) <i>MV clone</i>   | **           | **         | strong suppressor          | *          | mild suppressor   | XX         | higher expression                      |
| 14 | <i>nhr-122</i> (Y41D4B.9)                  | *            | X          | no effect                  | XX         | higher GFP        | XX         | higher expression                      |
| 15 | <i>nhr-164</i> (C41G6.5)                   | *            | **         |                            | X          | no effect         | XX         | higher expression                      |
| 16 | <i>nhr-199</i> (K06B4.10)                  | XX           | XX         | higher expression          | XX         | medium high       | XX         | both as 'no effect'                    |
| 17 | <i>nhr-209</i> (R07B7.16)                  | **           | **         | strong suppressor          |            | censored          | **         | low anterior expression                |
| 18 | <i>nhr-212</i> (T01G6.5)                   |              |            | censored                   | **         | strong suppressor | **         | strong suppressor                      |
| 19 | <i>nhr-213</i> (T06C12.13)                 | X            | **         | strong suppressor for some |            | censored          | *          |                                        |
| 20 | <i>nhr-255</i> (ZK678.2)                   | *            | **         | low anterior expression    | X          | no effect         | *          | low anterior expression                |
| 21 | <i>nhr-274</i> (Y41D4B.21)                 | **           | **         | arrested                   | **         | arrested          | **         | arrested                               |
| 22 | <i>nhr-274</i> (Y41D4B.21) <i>MV clone</i> | **           | **         |                            | **         |                   | **         |                                        |

\*\* strong suppression of GFP expression      XX increased GFP expression (Discrepancy with screen)      Clones did not reproducibly effect GFP levels or shorten *glp-1* longevity  
\* mild suppression of GFP expression      X no effect on GFP levels or slight increase (Discrepancy from screen)
