# Supplementary material for: Germline Signals Deploy NHR-49 to Modulate Fatty-Acid β-Oxidation and Desaturation in Somatic Tissues of C. elegans
Source: PubMed Central journal article supplement (PMC4256272; doi:10.1371/journal.pgen.1004829), 2014-12-04
Supplement: pgen.1004829.s014.pdf [file pgen.1004829.s014.pdf]

Ratnappan et al., REVISED. Table S2: Effect of RNAi inactivation of select suppressor 'nhr' clones on longevity of *glp-1* mutants

|    | RNAi Clone        | Whole-Life RNAi Trial #1            |                                       |               |               | Whole-Life RNAi Trial #2 |                                       |               |               | Adult-Only RNAi Trial #1             |                                       |               |               | Adult-Only RNAi Trial #2              |                                       |               |               |
|----|-------------------|-------------------------------------|---------------------------------------|---------------|---------------|--------------------------|---------------------------------------|---------------|---------------|--------------------------------------|---------------------------------------|---------------|---------------|---------------------------------------|---------------------------------------|---------------|---------------|
|    |                   | Mean + SEM                          | P vs. Empty Vector Ctrl. <sup>a</sup> | n = obs/total | % Suppression | Mean + SEM               | P vs. Empty Vector Ctrl. <sup>a</sup> | n = obs/total | % Suppression | Mean + SEM                           | P vs. Empty Vector Ctrl. <sup>a</sup> | n = obs/total | % Suppression | Mean + SEM                            | P vs. Empty Vector Ctrl. <sup>a</sup> | n = obs/total | % Suppression |
| 1  | Empty Vector      | 26.2 + 0.5                          |                                       | 84/89         |               | 19.1 + 0.2               |                                       | 51/62         |               | 27.5 + 0.2                           |                                       | 70/77         |               | 26.3 + 0.6                            |                                       | 92/96         |               |
| 2  | <i>daf-16</i>     | 14.3 + 0.1                          | <0.0001                               | 73/90         | 45.4          | 11.4 + 0.2               | <0.0001                               | 83/90         | 40.3          | 14.5 + 0.2                           | <0.0001                               | 84/87         | 47.2          | 16.4 + 0.2                            | <0.0001                               | 92/97         | 37.6          |
| 3  | <i>tcer-1</i>     | 17.0 + 0.2                          | <0.0001                               | 82/86         | 35.1          | 15.1 + 0.5               | <0.0001                               | 49/78         | 20.9          | 21.8 + 0.5                           | <0.0001                               | 82/85         | 20.7          | 22.3 + 0.3                            | 0.0003                                | 82/86         | 15.2          |
| 4  | <i>daf-12</i>     | 17.1 + 0.3                          | <0.0001                               | 85/97         | 34.7          | 15.7 + 0.2               | <0.0001                               | 66/91         | 17.8          | 19.7 + 0.3                           | <0.0001                               | 69/88         | 28.3          | 24.7 + 0.4                            | 0.012                                 | 98/97         | 6             |
| 5  | <i>nhr-31</i>     | 17.0 + 0.3                          | <0.0001**                             | 91/110        | 35.1          | 20.0 + 0.4               | 0.36                                  | 69/90         | ne            | 21.8 + 0.6                           | <0.0001                               | 87/95         | 20.7          |                                       |                                       |               |               |
| 6  | <i>nhr-49</i>     | 14.5 + 0.1                          | <0.0001*                              | 99/103        | 44.6          | 10.8 + 0.05              | <0.0001                               | 61/90         | 43.4          | 14.3 + 0.2                           | <0.0001*                              | 89/92         | 48            | 17.3 + 0.3                            | <0.0001*                              | 99/101        | 34.2          |
| 7  | <i>nhr-49 MV</i>  | 14.4 + 0.1                          | <0.0001*                              | 63/97         | 45            | 9.8 + 0.3                | <0.0001                               | 89/90         | 48.6          | 14.3 + 0.3                           | <0.0001*                              | 83/85         | 48            | 15.5 + 0.1                            | <0.0001*                              | 79/92         | 41            |
| 8  | <i>nhr-54</i>     | 20.2 + 0.3                          | 0.0001                                | 101/104       | 22.9          | 15.1 + 0.5               | 0.001                                 | 81/88         | 20.9          | 21.2 + 0.5                           | <0.0001                               | 81/96         | 22.9          | 22.7 + 0.2                            | 0.0026                                | 100/104       | 13.6          |
| 9  | <i>nhr-60</i>     | 21.3 + 0.9                          | 0.0002                                | 102/106       | 18.7          |                          |                                       |               |               |                                      |                                       |               |               |                                       |                                       |               |               |
| 10 | <i>nhr-71</i>     | 22.7 + 0.3                          | 0.0007                                | 103/104       | 13.3          |                          |                                       |               |               |                                      |                                       |               |               |                                       |                                       |               |               |
| 11 | <i>nhr-81</i>     | 19.4 + 0.4                          | <0.0001                               | 75/99         | 25.9          | 15.8 + 0.6               | 0.01                                  | 74/98         | 17.2          | 23.6 + 0.4                           | 0.007                                 | 66/90         | 14.1          |                                       |                                       |               |               |
| 12 | <i>nhr-87</i>     | 23.4 + 0.5                          | 0.01                                  | 77/101        | 10.6          |                          |                                       |               |               |                                      |                                       |               |               |                                       |                                       |               |               |
| 13 | <i>nhr-87 MV</i>  | 23.3 + 0.6                          | 0.03                                  | 90/94         | 11            |                          |                                       |               |               |                                      |                                       |               |               |                                       |                                       |               |               |
| 14 | <i>nhr-209</i>    | 21.6 + 0.7                          | 0.0004                                | 104/105       | 17.5          |                          |                                       |               |               |                                      |                                       |               |               |                                       |                                       |               |               |
| 15 | <i>nhr-212</i>    | 17.2 + 0.2                          | <0.0001**                             | 94/101        | 34.3          | 16.0 + 0.6               | 0.01                                  | 67/89         | 16.2          | 23.3 + 0.8                           | 0.002                                 | 85/85         | 15.2          |                                       |                                       |               |               |
| 16 | <i>nhr-213</i>    | 21.5 + 0.6                          | 0.002                                 | 95/96         | 17.9          |                          |                                       |               |               |                                      |                                       |               |               |                                       |                                       |               |               |
| 17 | <i>nhr-255</i>    | 18.0 + 0.4                          | <0.0001**                             | 109/109       | 31.2          | 18.1 + 0.4               | 0.38                                  | 71/90         | ne            | 22.8 + 0.4                           | 0.0001                                | 88/101        | 17            |                                       |                                       |               |               |
| 18 | <i>nhr-274</i>    | 23.0 + 0.7                          | 0.0031                                | 98/100        | 12.2          |                          |                                       |               |               |                                      |                                       |               |               |                                       |                                       |               |               |
| 19 | <i>nhr-274 MV</i> | 23.1 + 0.4                          | 0.004                                 | 100/101       | 11.8          |                          |                                       |               |               |                                      |                                       |               |               |                                       |                                       |               |               |
|    |                   | P vs <i>daf-16</i> RNAi *0.94, 0.63 |                                       |               |               | ne: no effect            |                                       |               |               | P vs <i>daf-16</i> RNAi * 0.44, 0.83 |                                       |               |               | P vs <i>daf-16</i> RNAi * 0.01, 0.005 |                                       |               |               |
|    |                   | 0.06, 0.87                          |                                       |               |               |                          |                                       |               |               |                                      |                                       |               |               |                                       |                                       |               |               |
