# Supplementary material for: Germline Signals Deploy NHR-49 to Modulate Fatty-Acid β-Oxidation and Desaturation in Somatic Tissues of C. elegans
Source: PubMed Central journal article supplement (PMC4256272; doi:10.1371/journal.pgen.1004829), 2014-12-04
Supplement: pgen.1004829.s015.pdf [file pgen.1004829.s015.pdf]

Ratnappan et al., REVISED. Table S3: Effect of NHR-49 loss-of-function and overexpression on lifespan

| #  | Strain                                                     | Trial 1                  |            |            |                                                                                                 | Trial 2                  |            |            |                                                                                                   | Trial 3                  |             |            |                                                                                                     |
|----|------------------------------------------------------------|--------------------------|------------|------------|-------------------------------------------------------------------------------------------------|--------------------------|------------|------------|---------------------------------------------------------------------------------------------------|--------------------------|-------------|------------|-----------------------------------------------------------------------------------------------------|
|    |                                                            | n = Obs/Tot <sup>a</sup> | Mean ± SEM | P (vs. N2) | P (vs. other strains)                                                                           | n = Obs/Tot <sup>a</sup> | Mean ± SEM | P (vs. N2) | P (vs. other strains)                                                                             | n = Obs/Tot <sup>a</sup> | Mean ± SEM  | P (vs. N2) | P (vs. other strains)                                                                               |
| 1  | N2                                                         | 75/98                    | 21.6 ± 0.1 |            |                                                                                                 | 81/92                    | 22.8 ± 0.2 |            |                                                                                                   | 89/110                   | 22.6 ± 0.4  |            |                                                                                                     |
| 2  | AGP12a<br><i>nhr-49(-)</i>                                 | 89/100                   | 14.4 ± 0.2 | <0.0001    |                                                                                                 | 83/88                    | 13.7 ± 0.1 | <0.0001    |                                                                                                   | 59/75                    | 15.6 ± 0.2  | <0.0001    |                                                                                                     |
| 3  | AGP24f<br><i>Pnhr-49::nhr-49::GFP</i>                      | 47/84                    | 26.0 ± 0.4 | <0.0001    | <0.0001 (vs. <i>nhr-49</i> )<br><0.0001 (vs. GFP-ve siblings)                                   | 94/99                    | 23.1 ± 0.3 | 0.54       | <0.0001 (vs. <i>nhr-49</i> )<br>0.16 (vs GFP-ve siblings)                                         | 58/113                   | 25.9 ± 0.3  | 0.001      | <0.0001 (vs GFP-ve sibs)                                                                            |
| 4  | AGP 24f GFP-ve siblings                                    | 83/102                   | 21.3 ± 0.4 | 0.82       | <0.0001                                                                                         | 87/100                   | 20.3 ± 0.6 | 0.23       | <0.0001 (vs <i>nhr-49</i> )                                                                       | 82/137                   | 22.2 ± 0.3  | 0.9        |                                                                                                     |
| 5  | AGP33<br><i>nhr-49; Pnhr-49::nhr-49::GFP</i>               | 74/99                    | 24.2 ± 0.2 | 0.001      | <0.0001 (vs. <i>nhr-49</i> )<br><0.0001 (vs. GFP-ve siblings)                                   | 79/101                   | 25.1 ± 0.3 | <0.0001    | <0.0001 (vs. <i>nhr-49</i> )<br><0.0001 (vs. GFP-ve siblings)                                     |                          |             |            |                                                                                                     |
| 6  | AGP33 GFP-ve siblings                                      | 95/100                   | 14.1 ± 0.2 | <0.0001    | 0.41 (vs. <i>nhr-49</i> )                                                                       | 93/98                    | 12.4 ± 0.1 | <0.0001    | 0.02 (vs. <i>nhr-49</i> )                                                                         |                          |             |            |                                                                                                     |
| 7  | CF1903<br><i>glp1(-)</i>                                   | 94/101                   | 31.0 ± 0.5 |            |                                                                                                 | 74/104                   | 35.8 ± 0.3 |            |                                                                                                   | 82/83                    | 34.6 ± 0.02 |            |                                                                                                     |
| 8  | AGP22<br><i>nhr-49(-); glp1(-)</i>                         | 95/97                    | 14.1 ± 0.1 | <0.0001    | <0.0001 (vs. <i>glp-1</i> )                                                                     | 104/106                  | 17.9 ± 0.2 | <0.0001    | <0.0001 (vs. <i>glp-1</i> )                                                                       | 91/91                    | 13.6 ± 0.1  | <0.0001    | <0.0001 (vs. <i>glp-1</i> )                                                                         |
| 9  | AGP25<br><i>glp-1(-); Pnhr-49::nhr-49::GFP</i>             | 92/97                    | 35.3 ± 0.5 | <0.0001    | <0.0001 (vs. <i>nhr-49; glp-1</i> )<br>0.46 (vs. GFP-ve siblings)<br>0.001 (vs. <i>glp-1</i> )  | 97/98                    | 41.0 ± 0.7 | <0.0001    | <0.0001 (vs. <i>nhr-49; glp-1</i> )<br><0.0001 (vs. GFP-ve siblings)<br>0.002 (vs. <i>glp-1</i> ) |                          |             |            |                                                                                                     |
| 10 | AGP25 GFP-ve siblings                                      | 98/101                   | 34.7 ± 0.4 | <0.0001    | <0.0001 (vs. <i>nhr-49; glp-1</i> )<br>0.003 (vs. <i>glp-1</i> )                                | 104/119                  | 31.9 ± 0.7 | <0.0001    | <0.0001 (vs. <i>nhr-49; glp-1</i> )<br>0.02 (vs. <i>glp-1</i> )                                   |                          |             |            |                                                                                                     |
| 11 | AGP34a<br><i>nhr-49(-); glp-1(-); Pnhr-49::nhr-49::GFP</i> | 74/104                   | 30.2 ± 0.5 | <0.0001    | 0.73 (vs <i>glp-1</i> )<br><0.0001 (vs. <i>nhr-49; glp-1</i> )<br><0.0001 (vs. GFP-ve siblings) | 58/102                   | 34.1 ± 0.4 |            | 0.84 (vs. <i>glp-1</i> )<br><0.0001 (vs. <i>nhr-49; glp-1</i> )<br><0.0001 (vs. GFP-ve siblings)  |                          |             |            |                                                                                                     |
| 12 | AGP34a GFP-ve siblings                                     | 86/98                    | 17.0 ± 0.4 | <0.0001    | 0.0007 (vs. <i>nhr-49; glp-1</i> )                                                              | 101/107                  | 18.4 ± 0.2 | <0.0001    | 0.28 (vs. <i>nhr-49; glp-1</i> )                                                                  |                          |             |            |                                                                                                     |
| 13 | AGP28c<br><i>Pnhr-49::nhr-49::GFP</i>                      | 64/97                    | 30.0 ± 0.2 | <0.0001    | <0.0001 (vs. <i>nhr-49</i> )<br><0.0001 (vs. GFP-ve siblings)                                   |                          |            |            |                                                                                                   | 61/96                    | 28.2 ± 0.3  | <0.0001    | <0.0001 (vs. <i>nhr-49</i> )<br><0.0001 (vs. GFP-ve siblings)                                       |
| 14 | AGP 28c GFP-ve siblings                                    | 81/98                    | 22.0 ± 0.2 | 0.34       | <0.0001 (vs. <i>nhr-49</i> )                                                                    |                          |            |            |                                                                                                   | 56/66                    | 21.7 ± 0.4  | 0.61       | <0.0001 (vs. <i>nhr-49</i> )                                                                        |
| 15 | AGP30b<br><i>nhr-49; Pnhr-49::nhr-49::GFP</i>              | 69/85                    | 22.7 ± 0.3 | 0.11       | <0.0001 (vs. <i>nhr-49</i> )<br><0.0001 (vs. GFP-ve siblings)                                   |                          |            |            |                                                                                                   | 40/100                   | 24.7 ± 0.6  | 0.02       | <0.0001 (vs. <i>nhr-49</i> )<br><0.0001 (vs. GFP-ve siblings)                                       |
| 16 | AGP30b GFP-ve siblings                                     | 84/88                    | 14.1 ± 0.2 | <0.0001    | 0.5 (vs. <i>nhr-49</i> )                                                                        |                          |            |            |                                                                                                   | 56/80                    | 14.3 ± 0.1  | <0.0001    | 0.08 (vs. <i>nhr-49</i> )                                                                           |
| 17 | AGP29a<br><i>glp-1(-); Pnhr-49::nhr-49::GFP</i>            |                          |            |            |                                                                                                 |                          |            |            |                                                                                                   | 64/83                    | 35.4 ± 0.3  | 0.91       | <0.0001 (vs. <i>nhr-49; glp-1</i> )<br>0.0027 (vs. GFP-ve siblings)                                 |
| 18 | AGP29a GFP-ve siblings                                     |                          |            |            |                                                                                                 |                          |            |            |                                                                                                   | 84/87                    | 30.1 ± 0.3  | 0.001      | <0.0001 (vs. <i>nhr-49; glp-1</i> )                                                                 |
| 19 | AGP31<br><i>nhr-49(-); glp-1(-); Pnhr-49::nhr-49::GFP</i>  |                          |            |            |                                                                                                 |                          |            |            |                                                                                                   | 81/88                    | 26.6 ± 0.4  | <0.0001    | <0.0001 (vs. <i>glp-1</i> )<br><0.0001 (vs. <i>nhr-49; glp-1</i> )<br><0.0001 (vs. GFP-ve siblings) |
| 20 | AGP31 GFP-ve siblings                                      |                          |            |            |                                                                                                 |                          |            |            |                                                                                                   | 91/92                    | 14.9 ± 0.1  | <0.0001    | 0.0008 (vs. <i>nhr-49; glp-1</i> )                                                                  |
