# Supplementary material for: Germline Signals Deploy NHR-49 to Modulate Fatty-Acid β-Oxidation and Desaturation in Somatic Tissues of C. elegans
Source: PubMed Central journal article supplement (PMC4256272; doi:10.1371/journal.pgen.1004829), 2014-12-04
Supplement: pgen.1004829.s016.pdf [file pgen.1004829.s016.pdf]

Ratnappan et al., REVISED Table S4: Effect of *nhr-49* mutation on the longevity mediated by reduced IIS pathway activity and impaired mitochondrial electron transport

**S4A: Genetic Mutants**

| # | Strain                             | Trial 1                    |            |            |                                   |                      | Trial 2                    |             |            |                                    |                      | Trial 3                    |            |            |                                    |                      |
|---|------------------------------------|----------------------------|------------|------------|-----------------------------------|----------------------|----------------------------|-------------|------------|------------------------------------|----------------------|----------------------------|------------|------------|------------------------------------|----------------------|
|   |                                    | n = Obs/Total <sup>a</sup> | Mean ± SEM | P (vs. N2) | P (vs...)                         | % Lifespan Extension | n = Obs/Total <sup>a</sup> | Mean ± SEM  | P (vs. N2) | P (vs...)                          | % Lifespan Extension | n = Obs/Total <sup>a</sup> | Mean ± SEM | P (vs. N2) | P (vs...)                          | % Lifespan Extension |
| 1 | N2                                 | 48/80                      | 16.9 ± 0.1 |            |                                   |                      | 22/55                      | 22.5 ± 0.3  |            |                                    |                      | 59/70                      | 17.9 ± 0.5 |            |                                    |                      |
| 2 | <i>nhr-49(nr2041)</i>              | 80/91                      | 10.7 ± 0.1 | <0.0001    |                                   | - 37                 | 43/57                      | 12.2 ± 0.07 | <0.0001    |                                    | - 46                 | 74/86                      | 9.5 ± 0.2  | <0.0001    |                                    | - 47                 |
| 4 | <i>daf-2(e1370)</i>                | 42/67                      | 43.0 ± 0.6 | <0.0001    |                                   | + 154                | 51/89                      | 43.8 ± 0.5  | <0.0001    |                                    | + 97                 | 80/92                      | 40.6 ± 1.1 | <0.0001    |                                    | + 126                |
| 5 | <i>nhr-49(nr2041);daf-2(e1370)</i> | 46/74                      | 42.4 ± 0.6 | <0.0001    | 0.004 (vs. <i>daf-2 (e1370)</i> ) | + 150                | 21/82                      | 49.2 ± 1.4  |            | 0.0004 (vs. <i>daf-2 (e1370)</i> ) | + 118                | 70/90                      | 34.3 ± 1.1 | <0.0001    | 0.0001 (vs. <i>daf-2 (e1370)</i> ) | + 92                 |
| 6 | <i>daf-2(e1368)</i>                | 31/75                      | 30.6 ± 0.4 | <0.0001    |                                   | + 81                 | 50/80                      | 28.8 ± 0.6  | <0.0001    |                                    | + 28                 | 56/75                      | 24.4 ± 1.1 | <0.0001    |                                    | + 36                 |
| 7 | <i>nhr-49(nr2041);daf-2(e1368)</i> | 45/86                      | 29.5 ± 0.7 | <0.0001    | 0.73 (vs. <i>daf-2 (e1368)</i> )  | + 74                 | 63/94                      | 26.8 ± 0.9  | <0.0001    | 0.88 (vs. <i>daf-2 (e1368)</i> )   | + 19                 | 46/64                      | 21.2 ± 0.8 | <0.0001    | 0.001 (vs. <i>daf-2 (e1368)</i> )  | + 18                 |

**S4B: RNAi inactivation**

| # | Strain (RNAi Treatment)        | Trial 1                    |            |                               |                                             |                      | Trial 2                    |            |                               |                                                         |                      |
|---|--------------------------------|----------------------------|------------|-------------------------------|---------------------------------------------|----------------------|----------------------------|------------|-------------------------------|---------------------------------------------------------|----------------------|
|   |                                | n = Obs/Total <sup>a</sup> | Mean ± SEM | P (vs. Control <sup>b</sup> ) | P (vs. )                                    | % Lifespan Extension | n = Obs/Total <sup>a</sup> | Mean ± SEM | P (vs. Control <sup>b</sup> ) | P (vs. )                                                | % Lifespan Extension |
| 1 | N2 (Control)                   | 72/86                      | 17.0 ± 0.2 |                               |                                             |                      | 81/90                      | 16.9 ± 0.3 |                               |                                                         |                      |
| 2 | N2 ( <i>daf-2</i> )            | 58/84                      | 34.6 ± 0.6 | <0.0001                       |                                             | + 50                 | 70/90                      | 27.9 ± 0.6 | <0.0001                       |                                                         | + 40                 |
| 3 | N2 ( <i>cyc-1</i> )            | 64/83                      | 30.7 ± 1.1 | 0.0002                        |                                             | + 45                 | 85/90                      | 19.6 ± 0.3 | 0.0002                        |                                                         | + 14                 |
| 4 | N2 ( <i>cco-1</i> )            | 33/80                      | 28.3 ± 0.3 | <0.0001                       | P vs {N2 ( <i>cyc-1</i> ) 0.4               | + 40                 | 81/90                      | 21.0 ± 0.2 | <0.0001                       | P vs {N2 ( <i>cyc-1</i> ) 0.17                          | + 19                 |
| 5 | <i>nhr-49</i> (Control)        | 86/89                      | 12.9 ± 0.2 | <0.0001                       | P vs N2 (Control) <0.0001                   |                      | 86/89                      | 11.6 ± 0.1 | <0.0001                       | P vs N2 (Control) <0.0001                               |                      |
| 6 | <i>nhr-49</i> ( <i>daf-2</i> ) | 61/86                      | 25.0 ± 0.4 | <0.0001                       | P vs N2 (Control) <0.0001                   | + 49                 | 72/90                      | 28.0 ± 0.3 | <0.0001                       | P vs N2 (Control) <0.0001; P vs N2( <i>daf-2</i> ) 0.33 | + 58                 |
| 7 | <i>nhr-49</i> ( <i>cyc-1</i> ) | 85/95                      | 14.8 ± 0.2 | 0.0004                        |                                             | + 13                 | 85/95                      | 14.8 ± 0.2 | <0.0001                       |                                                         | + 22                 |
| 8 | <i>nhr-49</i> ( <i>cco-1</i> ) | 57/70                      | 19.4 ± 0.2 | <0.0001                       | P vs <i>nhr-49</i> ( <i>cyc-1</i> ) <0.0001 | + 33                 | 88/90                      | 14.1 ± 0.2 | <0.0001                       | P vs <i>nhr-49</i> ( <i>cyc-1</i> ) 0.05                | + 18                 |
