# Supplementary material for: Germline Signals Deploy NHR-49 to Modulate Fatty-Acid β-Oxidation and Desaturation in Somatic Tissues of C. elegans
Source: PubMed Central journal article supplement (PMC4256272; doi:10.1371/journal.pgen.1004829), 2014-12-04
Supplement: pgen.1004829.s017.pdf [file pgen.1004829.s017.pdf]

Ratnappan et al., REVISED Table S5: Effect of *daf-16* mutation on the longevity conferred by NHR-49 overexpression

**S5A: *daf-16* mutant background**

| # | Strain                                    | Trial 1                    |            |            |                                                                                               |                   | Trial 2                    |            |            |                                                                                               |                   |
|---|-------------------------------------------|----------------------------|------------|------------|-----------------------------------------------------------------------------------------------|-------------------|----------------------------|------------|------------|-----------------------------------------------------------------------------------------------|-------------------|
|   |                                           | n = Obs/Total <sup>a</sup> | Mean ± SEM | P (vs. N2) | P (vs. P vs. <i>daf-16</i> , <i>daf-16</i> ; <i>Pnhr-49::nhr-49::GFP</i> and <i>nhr-49</i> )  | % Lifespan Change | n = Obs/Total <sup>a</sup> | Mean ± SEM | P (vs. N2) | P (vs. <i>daf-16</i> , <i>daf-16</i> ; <i>Pnhr-49::nhr-49::GFP</i> and <i>nhr-49</i> )        | % Lifespan Change |
| 1 | N2                                        | 67/109                     | 18.5 ± 0.3 |            |                                                                                               |                   | 106/24                     | 18.6 ± 0.3 |            |                                                                                               |                   |
| 2 | <i>nhr-49(nr2041)</i>                     | 87/96                      | 12.7 ± 0.1 | <0.0001    |                                                                                               | -31               | 116/118                    | 11.2 ± 0.1 | <0.0001    |                                                                                               | -40               |
| 3 | <i>daf-16(mu86)</i>                       | 56/120                     | 15.6 ± 0.2 | 0.001      |                                                                                               | -16               | 62/122                     | 15.6 ± 0.2 | 0.001      |                                                                                               | -16               |
| 4 | <i>Pnhr-49::nhr-49::GFP</i>               | 40/98                      | 24.9 ± 0.2 | <0.0001    | <0.0001 (P vs <i>daf-16</i> , <i>daf-16</i> ; <i>Pnhr-49::nhr-49::GFP</i> and <i>nhr-49</i> ) | + 34              | 37/115                     | 24.1 ± 0.1 | <0.0001    | <0.0001 (P vs <i>daf-16</i> , <i>daf-16</i> ; <i>Pnhr-49::nhr-49::GFP</i> and <i>nhr-49</i> ) | + 29              |
| 5 | <i>daf-16(mu86); Pnhr-49::nhr-49::GFP</i> | 56/96                      | 17.4 ± 0.3 | 0.26       | 0.11 (vs. <i>daf-16</i> )                                                                     | - 6               | 82/118                     | 16.3 ± 0.2 | 0.001      | 0.03 (vs. <i>daf-16</i> )                                                                     | -12               |

**S5B: *daf-16*; *glp-1* mutant background**

|   |                                                           |        |            |                             |                                                                        |  |       |            |                             |                                                                         |  |
|---|-----------------------------------------------------------|--------|------------|-----------------------------|------------------------------------------------------------------------|--|-------|------------|-----------------------------|-------------------------------------------------------------------------|--|
| 1 | <i>glp-1</i>                                              | 75/91  | 36.9 ± 0.2 |                             |                                                                        |  | 72/80 | 31.6 ± 0.3 |                             |                                                                         |  |
| 2 | <i>nhr-49; glp-1</i>                                      | 76/100 | 14.2 ± 0.2 | <0.0001 (vs. <i>glp-1</i> ) |                                                                        |  | 47/64 | 15.7 ± 0.3 | <0.0001 (vs. <i>glp-1</i> ) |                                                                         |  |
| 3 | <i>daf-16; glp-1</i>                                      | 75/90  | 20.4 ± 0.3 | <0.0001 (vs. <i>glp-1</i> ) |                                                                        |  | 70/80 | 17.6 ± 0.3 | <0.0001 (vs. <i>glp-1</i> ) |                                                                         |  |
| 4 | <i>daf-16; glp-1; NHR-49::GFP</i>                         | 74/89  | 22.8 ± 0.3 | <0.0001 (vs. <i>glp-1</i> ) | 0.001 (P vs. <i>daf-16; glp-1</i> ); 0.16 (vs. non-transgenic sibling) |  | 74/91 | 20.1 ± 0.2 | <0.0001 (vs. <i>glp-1</i> ) | 0.001 (P vs. <i>daf-16; glp-1</i> ); 0.002 (vs. non-transgenic sibling) |  |
| 5 | <i>daf-16; glp-1; NHR-49::GFP</i> non-transgenic siblings | 80/90  | 20.2 ± 0.2 | <0.0001 (vs. <i>glp-1</i> ) | 0.17 (vs. <i>daf-16; glp-1</i> )                                       |  | 63/80 | 22.3 ± 0.5 | <0.0001 (vs. <i>glp-1</i> ) | <0.0001 (vs. <i>daf-16; glp-1</i> )                                     |  |
