# Supplementary material for: Germline Signals Deploy NHR-49 to Modulate Fatty-Acid β-Oxidation and Desaturation in Somatic Tissues of C. elegans
Source: PubMed Central journal article supplement (PMC4256272; doi:10.1371/journal.pgen.1004829), 2014-12-04
Supplement: pgen.1004829.s018.pdf [file pgen.1004829.s018.pdf]

**Ratnappan et al., REVISED. Table S6:** Mitochondrial fatty-acid  $\beta$ -oxidation genes regulated by NHR-49 are required for the increased longevity of germline-less animals

|   |                                 |                                   | S6A: RNAi Inactivation in Germline-Less Adults |                            |                  |                              |                            | S6B: RNAi Inactivation in Wild-Type* Adults |                  |                              |                            |
|---|---------------------------------|-----------------------------------|------------------------------------------------|----------------------------|------------------|------------------------------|----------------------------|---------------------------------------------|------------------|------------------------------|----------------------------|
| # | Enzyme Encoded                  | Gene                              | Cosmid                                         | n = obs/total <sup>b</sup> | Mean $\pm$ SD    | P (vs Control <sup>b</sup> ) | Percent Effect on Lifespan | n = obs/total <sup>b</sup>                  | Mean $\pm$ SD    | P (vs Control <sup>b</sup> ) | Percent Effect on Lifespan |
|   |                                 | Empty Vector Control <sup>a</sup> |                                                | 57/67                      | 26.02 $\pm$ 0.95 | 0.00                         | 0                          | 64/65                                       | 15.06 $\pm$ 0.52 | 0.00                         |                            |
|   |                                 | <i>daf-16</i>                     | R13H8.1                                        | 72/73                      | 16.14 $\pm$ 0.52 | 0.00                         | - 38                       |                                             |                  |                              |                            |
|   |                                 | <i>tcer-1</i>                     | ZK1127.9                                       | 62/65                      | 18.75 $\pm$ 0.65 | 0.00                         | - 28                       |                                             |                  |                              |                            |
|   |                                 | <i>daf-2</i>                      | Y55D5A.5                                       |                            |                  |                              |                            | 65/69                                       | 19.41 $\pm$ 0.8  | 0.00                         | + 29                       |
| 1 | Acyl CoA Synthetase             | <i>acs-2</i>                      | F28F8.2                                        | 62/63                      | 22.52 $\pm$ 0.99 | 0.0216                       | - 13                       | 78/80                                       | 13.8 $\pm$ 0.34  | 0.03                         | -8.00                      |
| 2 | Acyl CoA Synthetase             | <i>acs-17</i>                     | C46F4.2                                        | 61/63                      | 19.38 $\pm$ 0.75 | <0.0001                      | - 26                       | 65/72                                       | 13.78 $\pm$ 0.45 | 0.09                         | -8.00                      |
| 3 | Acyl CoA Synthetase             | <i>acs-22</i>                     | D1009.1                                        |                            |                  |                              |                            | 54/54                                       | 12.98 $\pm$ 0.48 | 0.01                         | -14.00                     |
| 4 | Carnitine Palmiloyl Transferase | <i>cpt-2</i>                      | R07H5.2                                        | 43/45                      | 23.01 $\pm$ 0.91 | 0.0027                       | - 12                       | 59/62                                       | 14.22 $\pm$ 0.31 | 0.13                         | -5.00                      |
| 5 | Acyl CoA Dehydrogenase          | <i>acd-11</i>                     | Y45F3A.3                                       | 57/60                      | 22.05 $\pm$ 0.91 | 0.0015                       | - 15                       | 37/37                                       | 13.38 $\pm$ 0.63 | 0.05                         | -11.00                     |
| 6 | Enoyl CoA Hydratase             | <i>ech-7</i>                      | Y105E8A.4                                      | 68/69                      | 20.47 $\pm$ 0.88 | 0.0001                       | - 21                       | 54/59                                       | 14.34 $\pm$ 0.58 | 0.44                         | -5.00                      |
| 7 | Hydroxyl Acyl CoA Dehydrogenase | <i>hacd-1</i>                     | R09B5.6                                        | 67/67                      | 21.00 $\pm$ 0.92 | 0.0008                       | - 19                       | 64/69                                       | 15.26 $\pm$ 0.55 | 0.65                         | ne                         |
| 8 | HADHA                           | <i>ech-1.2</i>                    | T08B2.7                                        | 65/66                      | 22.39 $\pm$ 0.92 | 0.0055                       | - 14                       | 40/40                                       | 13.85 $\pm$ 0.71 | 0.28                         | -8.00                      |
| 9 | Thiolase                        | <i>acaa-2</i>                     | F53A2.7                                        | 63/64                      | 23.97 $\pm$ 0.92 | 0.06                         | - 8                        | 58/62                                       | 13.94 $\pm$ 0.63 | 0.35                         | -7.00                      |
