# Supplementary material for: Germline Signals Deploy NHR-49 to Modulate Fatty-Acid β-Oxidation and Desaturation in Somatic Tissues of C. elegans
Source: PubMed Central journal article supplement (PMC4256272; doi:10.1371/journal.pgen.1004829), 2014-12-04
Supplement: pgen.1004829.s019.pdf [file pgen.1004829.s019.pdf]

Ratnappan et al., REVISED. Table S7. Oleic Acid supplementation does not rescue lifespan phenotypes of *nhr-49* mutants

| Strain (Supplement)      | n =<br>Obs <sup>a</sup> /Total | Mean $\pm$ SEM   | P (OA vs.<br>Unsupplemented)       | P (vs. Internal Controls)                                              |
|--------------------------|--------------------------------|------------------|------------------------------------|------------------------------------------------------------------------|
| N2 (OA)                  | 48/60                          | 19.8 $\pm$ 0.8   | 0.0141 (vs. N2)                    |                                                                        |
| <i>nhr-49</i> (OA)       | 43/75                          | 11.0 $\pm$ 0.3   | <0.0001 (vs. <i>nhr-49</i> )       | <0.0001 [vs. N2 (OA), <i>glp-1</i> (OA)]                               |
| <i>glp-1</i> (OA)        | 43/60                          | 30.8 $\pm$ 1.1   | 0.0093 (vs. <i>glp-1</i> )         | <0.0001 [vs. N2 (OA), <i>nhr-49</i> (OA) and <i>nhr-49;glp-1</i> (OA)] |
| <i>nhr-49;glp-1</i> (OA) | 65/75                          | 9.2 $\pm$ 0.1    | <0.0001 (vs. <i>nhr-49;glp-1</i> ) | <0.0001 [vs. N2 (OA), <i>glp-1</i> (OA)]                               |
| N2                       | 29/38                          | 23.32 $\pm$ 1.11 |                                    |                                                                        |
| <i>nhr-49</i>            | 73/75                          | 9.01 $\pm$ 0.23  |                                    | <0.0001 (vs. N2 and <i>glp-1</i> )                                     |
| <i>glp-1</i>             | 54/61                          | 33.84 $\pm$ 1.02 |                                    | <0.0001 (vs. N2, <i>nhr-49</i> and <i>nhr-49;glp-1</i> )               |
| <i>nhr-49;glp-1</i>      | 74/75                          | 12.00 $\pm$ 0.21 |                                    | <0.0001 (vs. N2, <i>glp-1</i> )                                        |

OA: Oleic Acid

<sup>a</sup> Number of worms observed in the experiment
