# Supplementary material for: Germline Signals Deploy NHR-49 to Modulate Fatty-Acid β-Oxidation and Desaturation in Somatic Tissues of C. elegans
Source: PubMed Central journal article supplement (PMC4256272; doi:10.1371/journal.pgen.1004829), 2014-12-04
Supplement: pgen.1004829.s020.pdf [file pgen.1004829.s020.pdf]

Ratn et al., REVISED. Table S8: Strains used in this study

| Strain | Genotype                                                                                      | Comments                                                                                        |
|--------|-----------------------------------------------------------------------------------------------|-------------------------------------------------------------------------------------------------|
| N2     | Wild-type                                                                                     |                                                                                                 |
| CF1903 | <i>glp-1(e2141ts) III</i>                                                                     |                                                                                                 |
| CF1880 | <i>daf-16(mu86) I; glp-1(e2141ts) III</i>                                                     |                                                                                                 |
| CF2154 | <i>tcer-1(tm1452) II; glp-1(e2141ts) III</i>                                                  |                                                                                                 |
| CF1038 | <i>daf-16(mu86) I</i>                                                                         |                                                                                                 |
| CF1041 | <i>daf-2(e1370) III</i>                                                                       |                                                                                                 |
| DR1572 | <i>daf-2(e1368) III</i>                                                                       |                                                                                                 |
| CF512  | <i>fer-15(b26) II; fem-1(hc7) IV</i>                                                          |                                                                                                 |
| CF2573 | <i>glp-1(e2141ts) III; sls10314(Pdod-8::gfp + pCeh361)</i>                                    |                                                                                                 |
| AGP12a | <i>nhr-49(nr2041) I</i>                                                                       | obtained by out-crossing 3x to Ghazi lab N2                                                     |
| AGP22  | <i>nhr-49(nr2041) I; glp-1(e2141ts) III</i>                                                   | obtained by crossing AGP12a to CF1903                                                           |
| AGP94  | <i>nhr-49(nr2041) I; daf-2(e1370) III</i>                                                     | obtained by crossing AGP12a to CF1041                                                           |
| AGP95  | <i>nhr-49(nr2041) I; daf-2(e1368) III</i>                                                     | obtained by crossing AGP12a to DR1572                                                           |
| AGP24f | <i>glmEx5 (Pnhr-49::nhr-49::GFP + Pmyo-2::mCherry) (NHR-49::GFP)</i>                          | Injected pAG4 and <i>Pmyo-2::mCherry</i> (at 100 ng/μl and 15 ng/μl, respectively) into N2      |
| AGP28c | <i>glmEx6 (Pnhr-49::nhr-49::GFP + Pmyo-2::mCherry)</i>                                        | Injected pAG4 and <i>Pmyo-2::mCherry</i> (at 25 ng/μl and 3.75 ng/μl, respectively) into N2     |
| AGP25  | <i>glp-1(e2141ts) III; glmEx5 (Pnhr-49::nhr-49::GFP + Pmyo-2::mCherry)</i>                    | obtained by crossing AGP24f to CF1903                                                           |
| AGP29a | <i>glp-1(e2141ts) III; glmEx7 (Pnhr-49::nhr-49::GFP + Pmyo-2::mCherry)</i>                    | Injected pAG4 and <i>Pmyo-2::mCherry</i> (at 25 ng/μl and 3.75 ng/μl, respectively) into CF1903 |
| AGP33a | <i>nhr-49(nr2041) I; glmEx8 (Pnhr-49::nhr-49::GFP + Pmyo-2::mCherry)</i>                      | Injected pAG4 and <i>Pmyo-2::mCherry</i> (at 100 ng/μl and 15 ng/μl, respectively) into AGP12a  |
| AGP30b | <i>nhr-49(nr2041) I; glmEx9 (Pnhr-49::nhr-49::GFP + Pmyo-2::mCherry)</i>                      | Injected pAG4 and <i>Pmyo-2::mCherry</i> (at 25 ng/μl and 3.75 ng/μl, respectively) into AGP12a |
| AGP34a | <i>nhr-49(nr2041) I; glp-1(e2141ts) III; glmEx10 (Pnhr-49::nhr-49::GFP + Pmyo-2::mCherry)</i> | Injected pAG4 and <i>Pmyo-2::mCherry</i> (at 100 ng/μl and 15 ng/μl, respectively) into AGP22   |
| AGP31  | <i>nhr-49(nr2041) I; glp-1(e2141ts) III; glmEx11 (Pnhr-49::nhr-49::GFP + Pmyo-2::mCherry)</i> | Injected pAG4 and <i>Pmyo-2::mCherry</i> (at 25 ng/μl and 3.75 ng/μl, respectively) into AGP22  |
| AGP109 | <i>daf-16(mu86) I; glmEx24[Pnhr-49::nhr-49::GFP + pmyo-2::Cherry]</i>                         | Injected pAG4 and <i>Pmyo-2::mCherry</i> (at 100 ng/μl and 15 ng/μl, respectively) into CF1038  |
