# Supplementary material for: Germline Signals Deploy NHR-49 to Modulate Fatty-Acid β-Oxidation and Desaturation in Somatic Tissues of C. elegans
Source: PubMed Central journal article supplement (PMC4256272; doi:10.1371/journal.pgen.1004829), 2014-12-04
Supplement: pgen.1004829.s021.pdf [file pgen.1004829.s021.pdf]

**Ratn et al., REVISED. Table S9: Q-PCR primers of genes examined in this study.**

| <b>Gene</b>    | <b>Cosmid</b> | <b>Primer sequence</b> |                                 |
|----------------|---------------|------------------------|---------------------------------|
| <i>acs-2</i>   | F28F8.2       | Forward Primer         | 5' tccggataaggagttctgtg 3'      |
|                |               | Reverse Primer         | 5' attgacggacgtcatggt 3'        |
| <i>acs-17</i>  | C46F4.2       | Forward Primer         | 5' tatgctcaggttgacaaacg 3'      |
|                |               | Reverse Primer         | 5' aataattggctccttctcctg 3'     |
| <i>acs-22</i>  | D1009.1       | Forward Primer         | 5' ttgaatcaggtgaaacagca 3'      |
|                |               | Reverse Primer         | 5' caattcttgatcgtcaactgc 3'     |
| <i>cpt-2</i>   | R07H5.2       | Forward Primer         | 5' gcaagatggattcggattgg 3'      |
|                |               | Reverse Primer         | 5' tcacgtttcgactattgtctc 3'     |
| <i>acdh-11</i> | Y45F3A.3      | Forward Primer         | 5' aatacagccacgcaaagac 3'       |
|                |               | Reverse Primer         | 5' cgagaattgggtcatctttataagg 3' |
| <i>ech-7</i>   | Y105E8A.4     | Forward Primer         | 5' gagaatgactatttcacgaactgg 3'  |
|                |               | Reverse Primer         | 5' ctaaggcaaatccggtgacag 3'     |
| <i>hacd-1</i>  | R09B5.6       | Forward Primer         | 5' atactgatattccgcccgtg 3'      |
|                |               | Reverse Primer         | 5' ggaagatgtcaagttcagatcc 3'    |
| <i>ech-1.2</i> | T08B2.7       | Forward Primer         | 5' tggataagctccaatccga 3'       |
|                |               | Reverse Primer         | 5' atttggatgtcagctcctg 3'       |
| <i>aca-2</i>   | F53A2.7       | Forward Primer         | 5' atcttcgaggtaaatgaggc 3'      |
|                |               | Reverse Primer         | 5' ccaccattgacattcagct 3'       |
| <i>acdh-2</i>  | C17C3.12      | Forward Primer         | 5' agtaatgcaccgattgctg 3'       |
|                |               | Reverse Primer         | 5' ccaagattatcatcctctgtatcc 3'  |
| <i>acdh-9</i>  | F28A10.6      | Forward Primer         | 5' ggcagacttccagtataacc 3'      |
|                |               | Reverse Primer         | 5' gcgttctaacgattagtctg 3'      |
| <i>ech-1.1</i> | C29F3.1       | Forward Primer         | 5' ctgaggctaaggcatttgg 3'       |
|                |               | Reverse Primer         | 5' cattagtcgatccttgaacag 3'     |
| <i>cpt-5</i>   | F09F3.9       | Forward Primer         | 5' ctctgagtaccagtaatttccc 3'    |
|                |               | Reverse Primer         | 5' accaccaagcattatctgtc 3'      |
| <i>fat-5</i>   | W06D12.3      | Forward Primer         | 5' cgagatccgacaaatgcagg 3'      |
|                |               | Reverse Primer         | 5' aacacaagctgatatagtccg 3'     |
| <i>fat-6</i>   | VZK822L.1     | Forward Primer         | 5' ctctgtatgtgttcggagg 3'       |
|                |               | Reverse Primer         | 5' gatgacgtcatttgaagagc 3'      |
| <i>fat-7</i>   | F10D2.9       | Forward Primer         | 5' gctctctatgtgttctcagg 3'      |
|                |               | Reverse Primer         | 5' caatgatgtcgtttgaagagc 3'     |
| <i>nhr-49</i>  | K10C3.6       | Forward Primer         | 5' ttggcagaggtggattctc 3'       |
|                |               | Reverse Primer         | 5' ctgtaaagagaccggagcc 3'       |
| <i>pod-2</i>   | W09B6.1       | Forward Primer         | 5' gagcagtattacgagacgc 3'       |
|                |               | Reverse Primer         | 5' gagctgctgttcatactgt 3'       |
| <i>fasn-1</i>  | F32H2.5       | Forward Primer         | 5' ggataaactggagaaggatcg 3'     |
|                |               | Reverse Primer         | 5' atgttgcggaagactgag 3'        |
| <i>dgat-2</i>  | F59A1.10      | Forward Primer         | 5' tcggatatcatcctcatgga 3'      |
|                |               | Reverse Primer         | 5' atgccttgaacacttgc 3'         |
| <i>rpl-32</i>  | T24B8.1       | Forward Primer         | 5' agggaattgataaccgtgtccgca 3'  |
|                |               | Reverse Primer         | 5' gtaggactgcatgaggagcatgt 3'   |
| T7-primer      |               |                        | 5' taatacgactcactataggg 3'      |
